# Supplementary material for: Cytotoxicity of VEGF121/rGel on vascular endothelial cells resulting in inhibition of angiogenesis is mediated via VEGFR-2
Source: BMC Cancer. 2011 Aug 17;11:358. doi: 10.1186/1471-2407-11-358 (PMC3176242; doi:10.1186/1471-2407-11-358)
Supplement: Additional File 1 — At an equivalent molar concentration as VEGF121/rGel (48 nM), no internalization of recombinant gelonin (rGel) was detected in PAE/VEGFR-2 or PAE/VEGFR-1 cells over 24 h. [file 1471-2407-11-358-S1.DOC]

**Cytotoxicity of VEGF121/rGel on Vascular Endothelial Cells Resulting in Inhibition of Angiogenesis is Mediated via VEGFR-2**

Khalid A. Mohamedali, Sophia Ran, Candelaria Gomez-Manzano, Latha Ramdas, Jing Xu, Sehoon Kim, Lawrence H. Cheung, Walter N. Hittelman, Wei Zhang, Johannes Waltenberger, Philip E. Thorpe, and Michael G. Rosenblum

**Additional File 1**

At an equivalent molar concentration as VEGF121/rGel (48 nM), no internalization of recombinant gelonin (rGel) was detected in PAE/VEGFR-2 or PAE/VEGFR-1 cells over 24 h.
